# Supplementary material
Source: publisher site journal article supplement (https://www.dovepress.com/article/500518)
Supplement: Supplementary file 1 [file get_supplementary_file.php]

**Supplementary Figures**

**
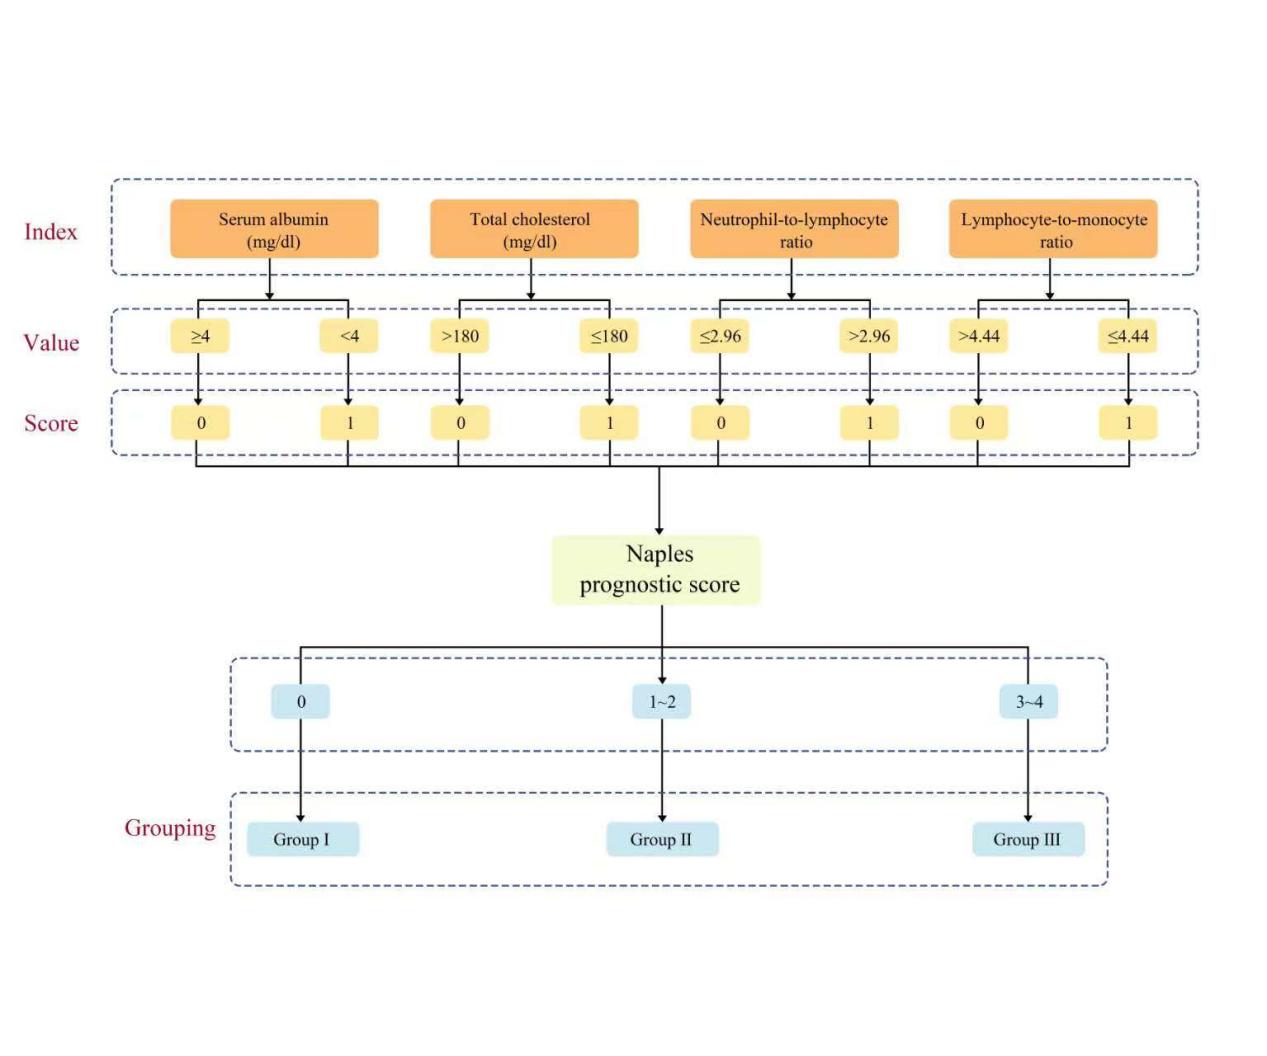
Figure S1** The calculation formula and grouping method of Naples prognosis score.

**
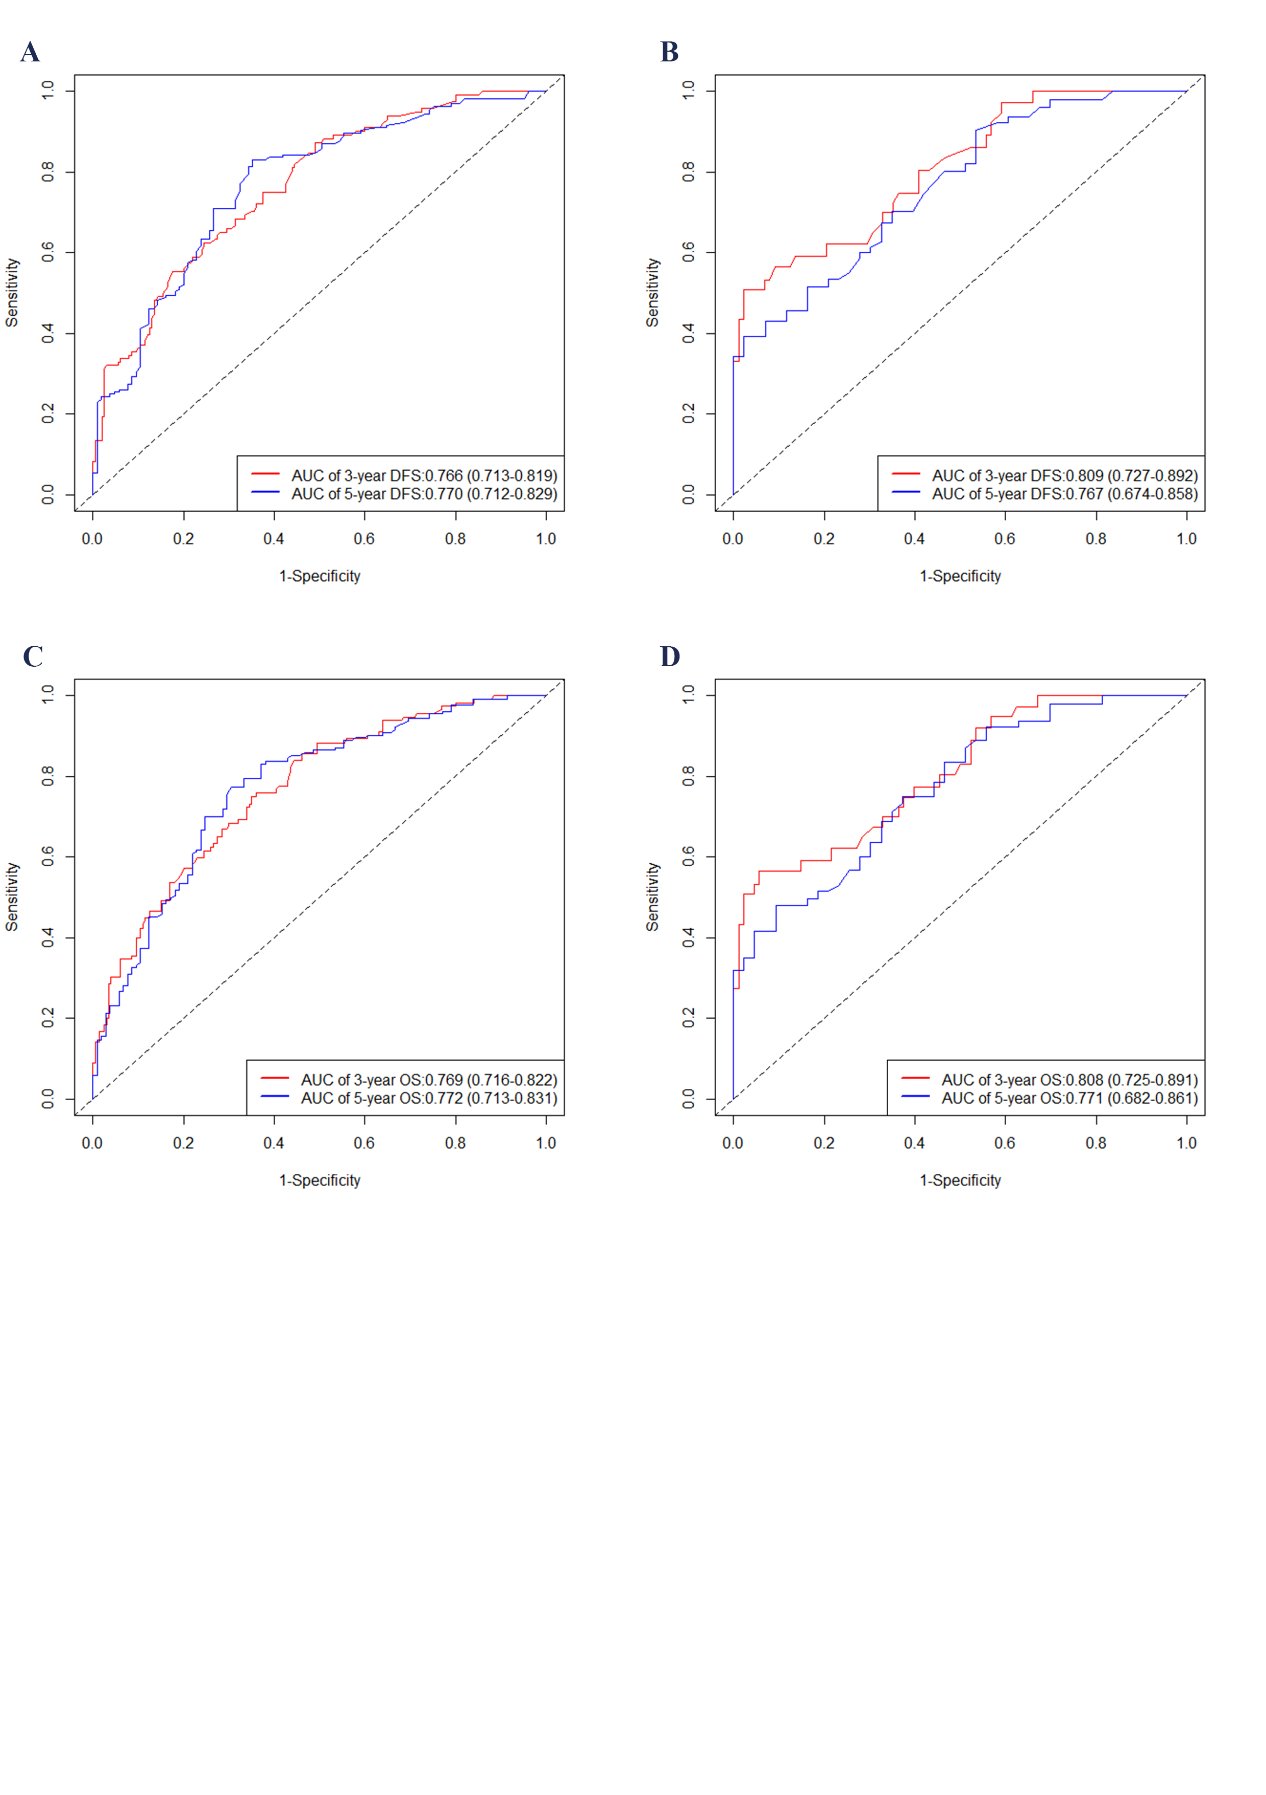
**

**Figure S2** Time-dependent ROC curves for the two nomograms. AUC for predicting 3-, and 5-year DFS in the training (**A**) and validation (**B**) set; ROC curves corresponding to 3-, and 5-year OS in the training (**C**) and validation (**D**) cohort, respectively.

**Abbreviations:** AUC, area under curve; OS, overall survival; DFS, disease-free survival; ROC, receiver operating characteristic.

**Supplementary Tables**

| **Table S1** Calculation formulas in this study | |
| --- | --- |
| **Clinical index** | **Calculation formula** |
| PLR | Platelet count / lymphocyte count |
| PAR | Platelet count / albumin (g/L) |
| NLR | Neutrophil count / lymphocyte count |
| LMR | Lymphocyte count / monocyte count |
| NPS | The following 4 conditions are awarded 1 point each if any are met, otherwise no points are awarded: serum albumin (mg/dL) ≥ 4, total cholesterol (mg/dL) > 180, NLR ≤ 2.96, and LMR > 4.44. The scores for the above 4 conditions are summed. The calculation range is 0-4 points. |
| PNI | Serum albumin (g/L) + (lymphocyte count ×5) |
| SII | Platelet count × NLR |
| SIS | Albumin < 40 g/L & LMR < 4.44 is scored as 2; Albumin ≥ 40 g/L or LMR ≥ 4.44 is scored as 1; Albumin ≥ 40 g/L & LMR ≥ 4.44 is scored as 0 |
| BMI | Mass (kg) / height2(m2) |
| **Abbreviation:**BMI, body mass index; LMR, lymphocyte-monocyte ratio; NLR, neutrophil-to-lymphocyte ratio; NPS, Naples prognostic score; PLR, platelet-to-lymphocyte ratio; PNI, prognostic nutrition index; SII; systemic immune-inflammation index, SIS, systemic inflammation score. | |

| **Table S2** Calculation formula for age-adjusted Charlson comorbidity index | |
| --- | --- |
| **Scores** | **Clinical conditions** |
| **For comorbidities** |  |
| 1 | Cerebrovascular disease; Chronic pulmonary disease; Connective tissue disease; Congestive heart failure; Dementia; Diabetes; Mild liver disease; Myocardial infarction; Peripheral vascular disease; Ulcer disease |
| 2 | Any tumor; Diabetes with endo organ damage; Hemiplegia; Leukemia; Lymphoma; Moderate or severe renal disease |
| 3 | Moderate or severe liver disease |
| 6 | Acquired immune deficiency syndrome; Metastatic solid tumor |
| **For age** |  |
| 1 (up to 4 points) | Each decade over age 40 years |

| **Table S3** Influence of adjuvant radiotherapy on DFS and OS in different subgroups. | | | | |
| --- | --- | --- | --- | --- |
| **Subgroups**  **(Total risk points)** | **Adjuvant radiotherapy** | | **Chi-Square** | **P** |
| **No** | **Yes** |
| High risk group for DFS  (≥ 225.3) | n = 96 | n = 50 | 5.31 | **0.021** |
|  |  |
| Medium risk group for DFS  (131.6-225.1) | n = 180 | n = 97 | 5.11 | **0.024** |
|  |  |
| Low risk group for DFS  (≤ 131.3) | n = 101 | n = 52 | 2.36 | 0.120 |
|  |  |
| High risk group for OS  (≥ 230.4) | n = 94 | n = 49 | 7.10 | **0.007** |
|  |  |
| Medium risk group for OS  (150.1-230.0) | n = 140 | n = 78 | 4.36 | **0.037** |
|  |  |
| Low risk group for OS  (≤ 150.3) | n = 143 | n = 72 | 1.38 | 0.240 |
|  |  |
| **Abbreviation:** DFS, disease-free survival; OS: overall survival. | | | | |
